# Supplementary material for: Performance evaluation of internal quality control rules, EWMA, CUSUM, and the novel machine learning model
Source: publisher site journal article supplement (doi:10.1515/tjb-2021-0199), 2021-12-01
Supplement: Supplementary file 1 [file j_tjb-2021-0199_suppl.docx]

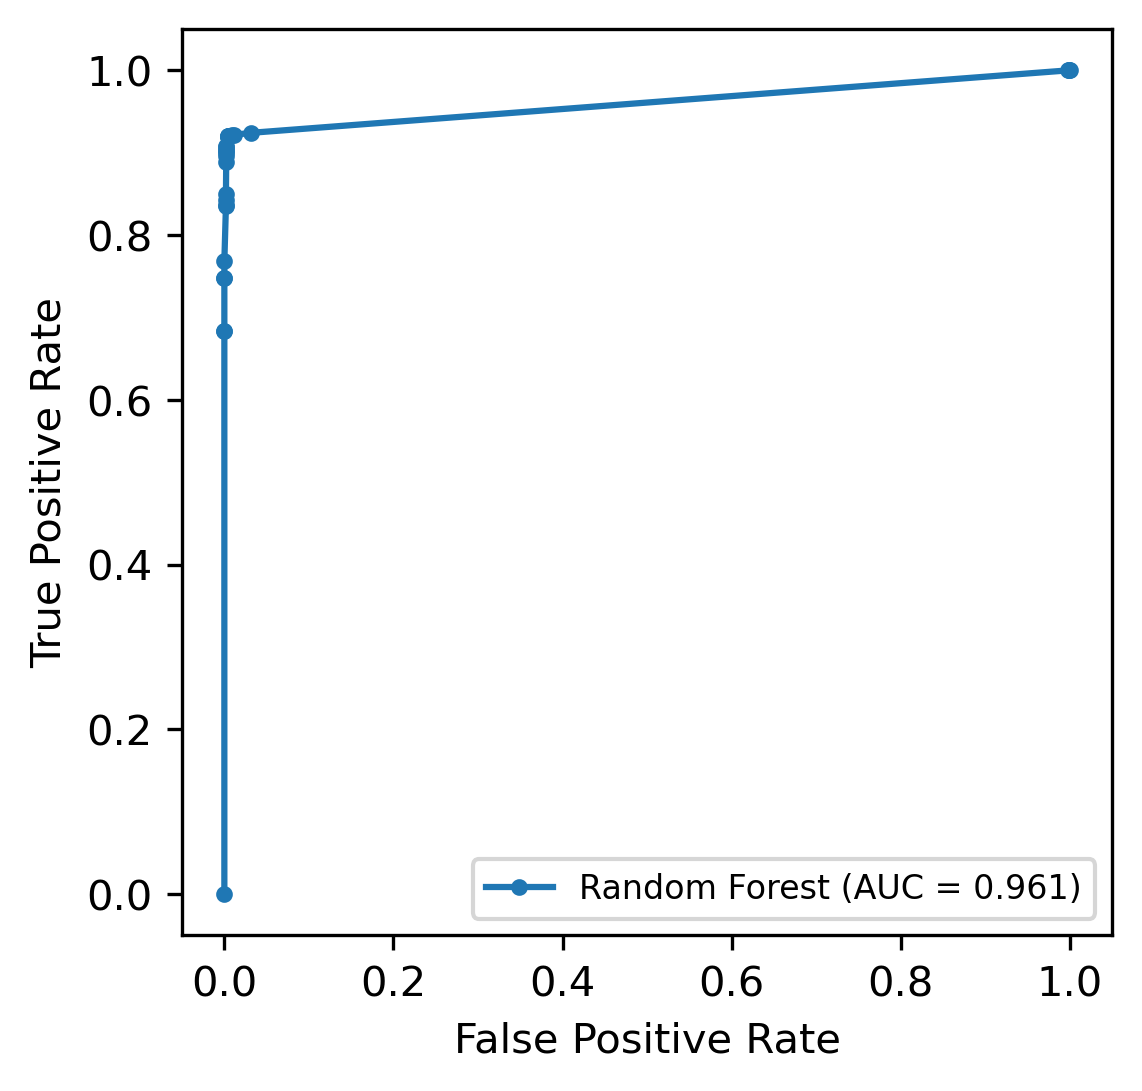


**Supplementary figure 1:** The ROC curve of Random Forest model and AUC value.


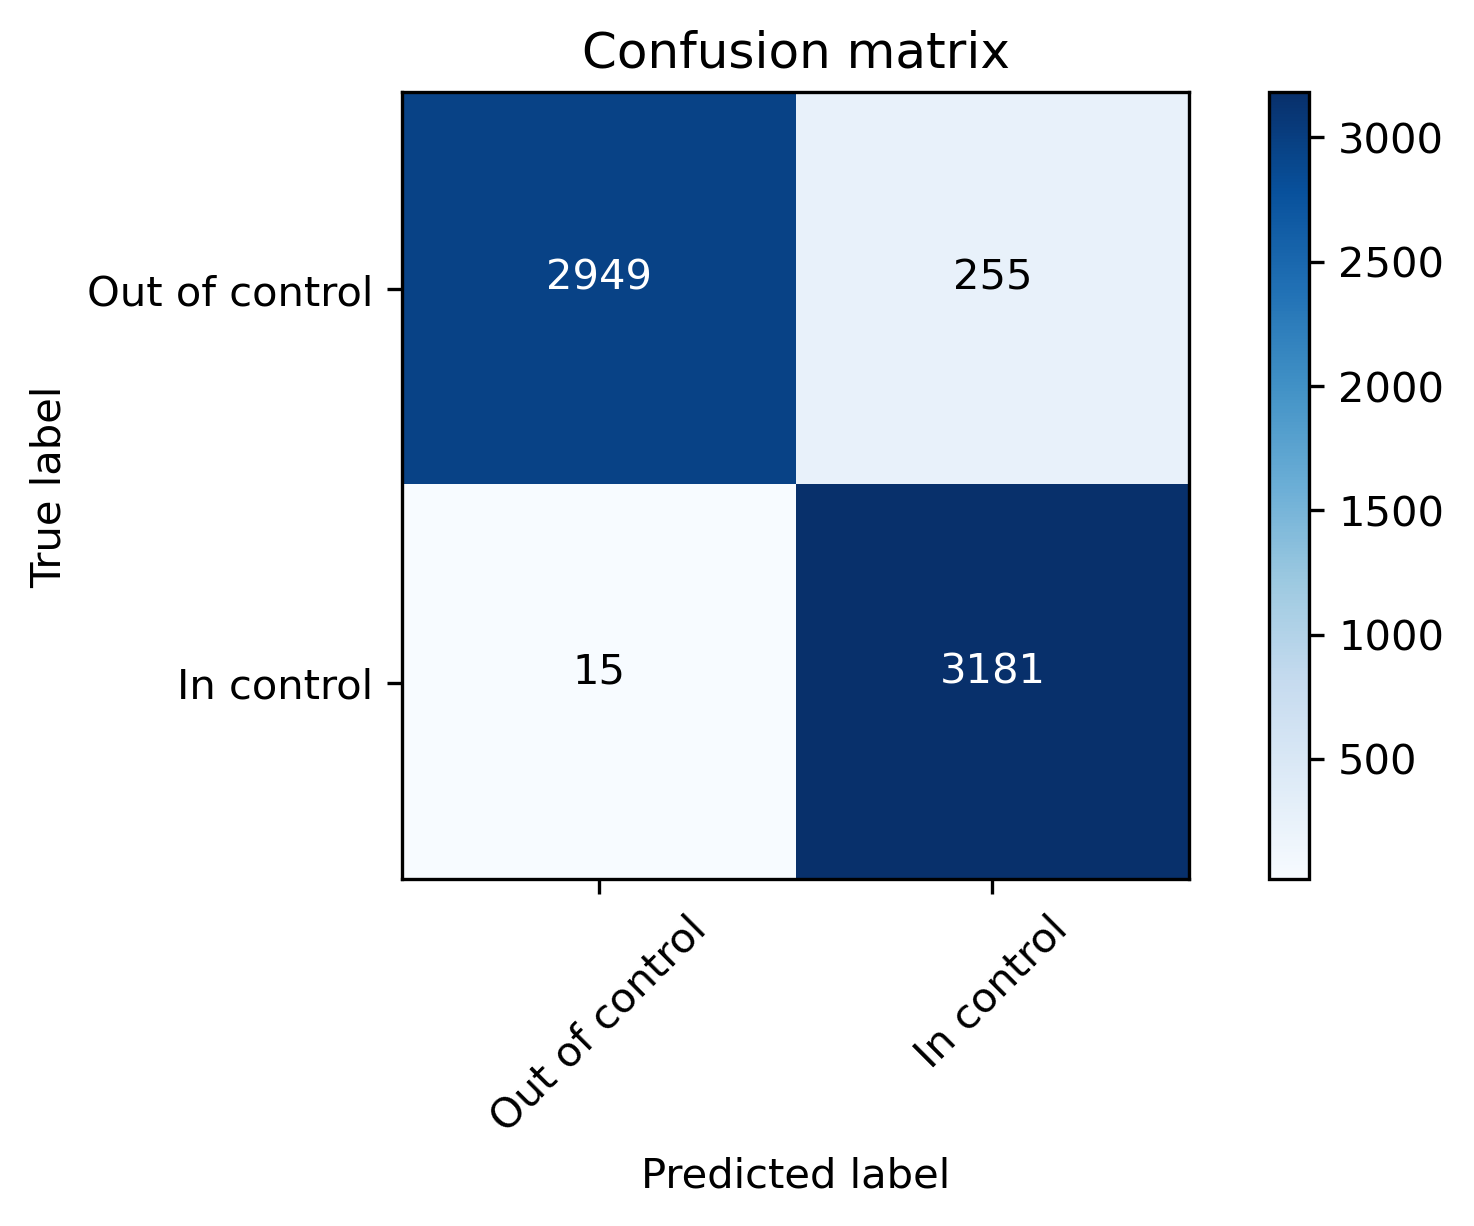


**Supplementary figure 2:** The confusion matrix
